# Supplementary material
Source: PubMed Central journal article supplement (PMC4251512)
Supplement: supp_2.4.E337_2014-0052_original_submission.pdf [file supp_2.4.E337_2014-0052_original_submission.pdf]

**It's more common that you think: Depression and its treatment in Canadian primary care practices, a cross-sectional analysis**

Sabrina T. Wong<sup>1,2</sup>, RN, PhD

Donna Manca<sup>3</sup>, MD, MCISc

David Barber<sup>4</sup>, MD

Rachael Morkem<sup>4</sup>, MSc

Shahriar Khan<sup>4</sup>, MSc

Jyoti Kotecha<sup>4</sup>, MPA, MRSC, CChem

Tyler Williamson<sup>4,5</sup>, PhD

Richard Birtwhistle<sup>4,5</sup>, MD

Scott Patten<sup>6,7</sup>, MD, PhD

1. Centre for Health Services and Policy Research, University of British Columbia, British Columbia, Canada
2. School of Nursing, University of British Columbia, Vancouver, British Columbia, Canada
3. Department of Family Medicine, University of Alberta, Edmonton, Alberta, Canada
4. Department of Family Medicine, Queen's University, Kingston, Ontario, Canada
5. Department of Public Health Sciences, Queen's University, Kingston, Ontario, Canada
6. Department of Community Health Sciences, University of Calgary, Calgary, Canada
7. Department of Psychiatry, University of Calgary, Calgary, Canada

**Key words:** CPCSSN (Canadian Primary Care Sentinel Surveillance Network), electronic medical record, primary health care, gender

Corresponding Author:

Dr. Sabrina Wong

UBC School of Nursing

T201 2211 Wesbrook Mall

Vancouver, BC

Canada V6T 2B5

604-827-5584

Sabrina.wong@nursing.ubc.ca

**ABSTRACT**

**Background.** The societal burden of depression includes an estimated cost of \$14 billion USD in health care expenditures and productivity losses. Among Canadian primary care patients with depression, we describe: (1) the prevalence among men and women, (2) their demographic and health characteristics, and (3) their medication treatment.

**Methods.** Using the Canadian Primary Care Sentinel Surveillance Network electronic medical record data, we examined whether the prevalence of depression varied by patient characteristics, number and the presence of the following chronic conditions: hypertension, diabetes, chronic obstructive pulmonary disease, osteoarthritis, dementia, epilepsy, and parkinsonism. We examined the type and number of medications prescribed. Analyses were completed by sex and regression models were used to examine whether patient characteristics and type of comorbidity was associated with having depression.

**Results.** Of the 304,412 patients who had at least one encounter, 14% had depression. Current or past smokers and women with a high BMI had higher rates of depression. One in four patients with depression had a chronic condition; Those with depression had 1.5times more primary care visits. About 85% of patients with depression are prescribed medication, most frequently SSRIs, followed by atypical antipsychotics.

**Interpretation.** Our data provides information on the epidemiology of depression in primary care including associations with being female, having a chronic condition, positive smoking history, or obesity in women. There may be a lower rate and/or higher unrecognized depression in men. Our findings may inform research and assist primary care providers with early detection and interventions in at risk patient populations.

## INTRODUCTION

Almost 20 years ago, Anderson et al [1] pointed out that case-level psychological distress, such as depression, in a population correlates highly with the mean population level of psychological distress.[1] Depression has been found to significantly worsen individuals' overall health status.[2] Previous studies report that the prevalence of depression was significantly higher in patients with heart disease, stroke, diabetes, cancer, rheumatoid arthritis, and osteoporosis compared to the general population.[3,4] It is likely that shared underlying biological mechanisms (e.g. inflammatory processes) are etiological factors in both other chronic conditions and depression.[5,6] The societal burden of depression includes an estimated cost of \$14 billion in health care expenditures and productivity losses.[7]

The World Health Organization reports that unipolar depressive disorder is more common than traffic accidents, cerebrovascular disease, and ischemic heart disease in disability-adjusted life years in middle and high-income countries.[7] Depression is so prevalent that it is considered to be a serious public health issue. Yet, it is most commonly diagnosed and treated in primary care.[2] The 12 month point prevalence rate of the most common form of depression, "Major Depressive Disorder" (MDD), ranges from 5%-14%.[2] The largest study completed on depression, the WHO Collaborative Study of Psychological Problems in General health care, which included 26,000 patients in 15 centers worldwide, found a point prevalence rate of 10.4% for ICD-10 depression.[8] It is estimated over the course of a single year, 1,360,000 Canadians meet the DSM-IV criteria for having MDD alone.[2] However, to date, there has not been a large Canadian study in primary care to determine the prevalence of MDD or any form of depression.

1  
2  
3  
4  
5  
6 In order to determine the prevalence of depression amongst patients living in Canada, we used  
7  
8 primary care electronic medical record (EMR) data collected for the purpose of surveillance of  
9  
10 chronic conditions. The Canadian Primary Care Sentinel Surveillance Network (CPCSSN) is the  
11  
12 first pan-Canadian multi-disease public and population health surveillance system. The purpose  
13  
14 of this study was to describe: (1) the prevalence of depression among men and women in  
15  
16 Canada, (2) characteristics of men and women who have depression, and (3) the treatment (type  
17  
18 and number of prescriptions) provided to those who have been diagnosed with depression in a  
19  
20 primary care setting in Canada.  
21  
22  
23  
24  
25  
26  
27

## 28 **METHODS**

29  
30 *Data source: Canadian Primary Care Sentinel Surveillance Network (CPCSSN).* The CPCSSN  
31  
32 consists of 10 practice based research networks (PBRNs) across Canada. It contains almost 500  
33  
34 sentinel primary care providers (FPs and nurse practitioners) and over 600,000 patients.[9] Each  
35  
36 consenting sentinel contributes de-identified EMR patient data on a quarterly basis. Patients of  
37  
38 consenting sentinel providers can decline to participate in the CPCSSN (less than 0.01%) and  
39  
40 their EMR records are excluded from the CPCSSN. All PBRNs have received research ethics  
41  
42 board approval from their institution as well as Health Canada ethics approval for collecting this  
43  
44 information. In order to optimize the quality, comparability, and usefulness of data for research,  
45  
46 each network's data manager transforms the extracted data into a common database template.  
47  
48 Various checks for completeness and validity are performed, followed by running several  
49  
50 algorithms for identifying chronic disease cases and for coding textual data into discrete  
51  
52 categories. Once data processing is complete, each PBRN database is securely submitted to a  
53  
54  
55  
56  
57  
58  
59  
60

1  
2  
3  
4  
5  
6 central repository where a national CPCSSN database is constructed, checked and prepared for  
7  
8 quarterly analysis and reporting.  
9

10  
11 *Depression Case Definition.* The CPCSSN developed and validated a case definition for  
12  
13 depression which uses a combination of ICD9 codes and free text searches within the problem  
14  
15 list, billing and encounter diagnoses and the medication history.[10] Previous case validation  
16  
17 work has shown that the CPCSSN depression algorithm performed adequately with a sensitivity  
18  
19 of 81.1% (95% CI: 77.2-85.0), a specificity of 94.8% (95% CI: 93.7-95.9), a positive predictive  
20  
21 value of 79.6% (95% CI: 75.7-83.6), and a negative predictive value of 95.2% (95% CI: 94.1-  
22  
23 96.3)].[10]  
24  
25  
26  
27  
28

29 *Inclusion criteria.* All patients as of Dec 31, 2012 with a CPCSSN diagnosis of depression who  
30  
31 visited their primary care provider between Jan. 1, 2000 to Dec. 31, 2012 were included in this  
32  
33 study.  
34  
35

36 *Variables of Interest.* We examined whether the prevalence of depression varied by patient  
37  
38 characteristics including; age, sex, rural or urban residence, smoking status, and body mass index  
39  
40 (BMI). We also examined whether those with depression had any of the other chronic conditions  
41  
42 for which CPCSSN has a validated case definition (hypertension, diabetes, chronic obstructive  
43  
44 pulmonary disease [COPD], osteoarthritis, dementia, epilepsy, and parkinsonism) as well as the  
45  
46 number of chronic conditions. Finally, we examined the type and number of medications  
47  
48 prescribed for those with a diagnosis of depression (Table 1).  
49  
50  
51  
52  
53  
54

55 **Insert Table 1. Medications**  
56  
57  
58  
59  
60

1  
2  
3  
4  
5  
6 *Patient characteristics.* We determined patients' residence in rural or urban areas using the first  
7 three digits of the practice's postal code, also known as the forward sortation area (FSA).

8  
9  
10 Following Canada Post's procedure for classification, we coded residence as rural if there was a  
11 value of zero in the second digit of their FSAs and urban for those with all other values.[11]

12  
13 Smoking status was recorded in three categories: 1) never having smoked coded as "non  
14 smokers", 2) those who smoke, regardless of frequency and amount were coded as "smokers"  
15 and 3) "past smokers" were those who reported quitting. Body Mass Index (BMI) was calculated  
16 based on the most recent height and weight data available. The BMI values were classified as:  
17 underweight (<18), normal (18-24), overweight (25-29), and obese ( $\geq 30$ ).

18  
19  
20  
21  
22  
23  
24  
25  
26  
27  
28 *Medication.* We developed a list of commonly used medications for depression (see Table 2) to  
29 identify patients who have been prescribed depression medications. The medications were  
30 categorized as: SSRI (selective serotonin reuptake inhibitors), Tricyclic/Tetracyclic, SNRI  
31 (serotonin norepinephrine reuptake inhibitors), SARI (serotonin antagonist and reuptake  
32 inhibitors), Atypical (antipsychotics), MAOI (monoamine oxidase inhibitors), and Bipolar (mood  
33 stabilizers). The generic names of the prescribed medication were extracted from the actual text  
34 recorded in the EMR.  
35  
36  
37  
38  
39  
40  
41  
42  
43

44  
45 *Analysis.* Data were analyzed by sex and as a total sample. We examined the prevalence of  
46 depression among those who had visited their primary care provider in the last 2 years.

47  
48 Descriptive statistics were used to calculate the mean number of comorbidities, and type and  
49 number of medications prescribed. We used a series of age-adjusted log-binominal regression  
50 models to examine whether patient characteristics and type of comorbidity was significantly  
51 associated with having a diagnosis of depression. The log-binominal approach is akin to a  
52  
53  
54  
55  
56  
57  
58  
59  
60

1  
2  
3  
4  
5  
6 logistic regression approach but is more appropriate to use when trying to estimate the  
7  
8 prevalence ratio (relative risk).[12] All analyses were done using SAS 9.3.  
9

## 10 11 **RESULTS**

12  
13 As of December 31, 2012, the CPCSSN database contained a total of 304,412 patients who had  
14  
15 at least one encounter between Jan. 1, 2010 and Dec. 31, 2012. Of these, 41,274 (14%) had a  
16  
17 diagnosis of Depression. Figure 1 shows that across all age categories, depression was more  
18  
19 prevalent among women compared with men. Almost 17% (n=28,526) of women who had seen  
20  
21 their primary care provider during these two years had depression compared with 10%  
22  
23 (n=12,748) of men.  
24  
25  
26  
27

### 28 **Figure 1. Prevalence of depression by age and sex**

29  
30 Table 2 shows that after adjusting for age, our regression models suggest that living in a rural  
31  
32 area for both men and women was somewhat protective against depression. Both men and  
33  
34 women who are considered a current or past smoker have a significantly higher risk of having  
35  
36 depression. Women who were overweight or obese had a higher rate of depression compared to  
37  
38 women who had a normal BMI.  
39  
40  
41  
42

### 43 **Table 2. Age Adjusted Characteristics associated with depression for men and women**

44  
45 Over half of men (54%) and women (59%) have only a diagnosis of depression (Table 3). Yet,  
46  
47 one out of four people with depression also have one other chronic condition for which CPCSSN  
48  
49 has a validated case definition. There are more men and women who have depression when they  
50  
51 also have another chronic condition. Table 4 shows that for those with a chronic condition, the  
52  
53 prevalence of depression is significantly higher. The prevalence of depression is highest in those  
54  
55 who have been diagnosed with dementia, followed by Parkinsonism and epilepsy.  
56  
57  
58  
59  
60

**Insert Table 3. Presence of depression by number of chronic conditions****Insert Table 4. Age adjusted prevalence of depression by comorbidity**

The mean number of encounters with the primary care provider during a 12-month period is higher for those with depression compared to those without depression (Table 5). This pattern remains across gender and a longer period of time (24 months). Notably, even after controlling for age, gender, location (rural, urban), and all other chronic conditions (hypertension, diabetes, chronic obstructive pulmonary disease, osteoarthritis, dementia, epilepsy, parkinsonism), those with depression will have 1.5 times (95% CI: 1.5-1.6) more visits to their primary care provider compared to those who do not have depression.

**Insert Table 5. Utilization: number of encounters with primary care provider**

About 85% of patients with depression are prescribed some form of depression medication. Almost half (48%) were prescribed one depression medication whereas about 23% were prescribed two depression medications (Table 6). Over one third (34% men; 38% women) of patients were simultaneously prescribed more than two antidepressant medications. Table 7 shows that the most frequently used medications are SSRIs (65%, men; 69% women), followed by atypical antipsychotics (24%, men; 22.3% women) and SNRIs (19% men; 22% women).

**Insert Table 6. Number of depression medications taken by patients with depression****Insert Table 7. Types of depression medications used by patients with depression**



## DISCUSSION

This study adds new knowledge and applies novel approaches to examining the prevalence of depression among men and women in Canada. It is the largest study on depression in Canada and is based on the largest population of those who have been diagnosed with depression in the world. While the 24-month point prevalence (13.6 for all) is higher than what Üstün found for a 12-month prevalence,[4] we would expect it to be higher given that we did not restrict to MDD. Notably, the prevalence of depression for men and women in this study was similar to what has been found using the national 2002 Canadian Community Health Survey, Mental Health component.[13]

Our results are consistent with past work which demonstrate a positive association between smoking status and having one or more chronic conditions.[14–16] For women, a BMI indicating obesity is another characteristic associated with depression. A high BMI for women could increase their negative perceptions about their bodies; Sociological work suggests that women's perceived body image is related to depression.[17] Yet, more work is needed to examine whether medication side effects, particularly from atypical antipsychotics, cause excessive weight gain in women. Primary care providers may want to screen for depression in women with a BMI indicative of obesity, or communicate to patients that a known side effect of atypical antipsychotics is weight gain.

Another important finding is that women have a higher prevalence of depression across all age groups compared to men. Although most people will see a family physician (FP) at least once during a 24 month period, the recognition of MDD by FPs has been found to be lower than

1  
2  
3  
4  
5  
6 50%. [5] Mitchell, et al [18] suggest that under-identification of patients with MDD, likely the  
7  
8 less severely depressed patients, is due to the judgment that presenting symptoms are clinically  
9  
10 insignificant. [5] Given that women tend to utilize primary care more than men, it could be that  
11  
12 depression symptoms in women are more easily recognized by primary care providers compared  
13  
14 to men. The manifestation of depressive symptoms may be different in men and therefore less  
15  
16 easily recognized as clinically significant. Indeed, men will rarely mention any emotional or  
17  
18 behavioural difficulties to their providers and may only discuss any emotional problems in terms  
19  
20 of “stress.” [19] An implication from this work is that providers may want to more actively screen  
21  
22 for depression among their male patients.  
23  
24  
25  
26  
27  
28  
29

30 The CPCSSN data indicate that many more patients with depression are receiving some  
31  
32 antidepressant medication (85%) than what has been reported in the past (60%). [2] This could be  
33  
34 reflective of widespread increasing use of antidepressant medications in Canada or the fact that  
35  
36 these patients had stronger connections to primary care and therefore better access to  
37  
38 treatment. [20] Reasons for patients to receive more than two antidepressants include  
39  
40 augmentation to treatment, to stabilize his/her mood, or address untoward side effects from the  
41  
42 medications. Either way, these findings suggest that primary care providers are comfortable  
43  
44 managing more complex cases of depression, such as those not responding to a single agent.  
45  
46 Notably, these results suggest more work is needed to examine the high use of atypical  
47  
48 antipsychotics in those with depression.  
49  
50  
51  
52  
53  
54  
55  
56  
57  
58  
59  
60

1  
2  
3  
4  
5  
6 The 15% who are reported as having depression but not taking any antidepressants is not  
7  
8 unexpected and may be an area for further study. A longitudinal study of 380 subjects found that  
9  
10 a cumulative proportion of 85% experienced a recurrence[21] hence we would expect 15% not to  
11  
12 be on any medication. It is also possible that we have not captured the true proportion of patients  
13  
14 on medication as antidepressants prescribed by a psychiatrist may not get recorded in the EMR.  
15  
16 Also, not all depressed patients may be using medications; cognitive based therapy is a widely  
17  
18 used evidence based alternative treatment.[22]  
19  
20  
21  
22  
23  
24

25 Use of the CPCSSN data provided a novel approach to examining lifetime prevalence of  
26  
27 depression. Historically, the assessment of lifetime prevalence is based on retrospective  
28  
29 assessment instruments and therefore subject to recall bias.[23] Our prospective examination of  
30  
31 the clinical data avoids the recall bias that has been thought to influence the pattern of age-  
32  
33 specific lifetime prevalence. While many past studies reported a decline in lifetime prevalence  
34  
35 with age, our data suggests there is no decline in lifetime prevalence of depression.[24]  
36  
37  
38  
39  
40  
41

42 Our study is not without limitations. Causality cannot be inferred due to the cross-sectional  
43  
44 nature of the data. Our depression case finding definition is imperfect in that it could misclassify  
45  
46 other conditions as a diagnosis of depression since the ICD9 code 296 (affective psychoses)  
47  
48 encompasses diagnostic subcategories for depression (ICD9 296.2, 296.3, 296.9) and bipolar  
49  
50 disorders.[25] The definition monitors lifetime prevalence so it is possible that we are over-  
51  
52 reporting those with depression. Given that our prevalence rate for depression is similar to what  
53  
54 has been found in the past, it's likely that our case finding definition is more likely under-  
55  
56  
57  
58  
59  
60

1  
2  
3  
4  
5  
6 reporting the presence of depression. Notably, this under-reporting is affected by what is  
7  
8 recorded in the EMR. In some cases, it could be that the FP did not recognize the symptoms of  
9  
10 depression as being clinically significant. In other cases, data may be missing from the EMR  
11  
12 since some patients are being treated for depression by a psychiatrist or other health professional.  
13  
14 Finally, it is not possible to differentiate severity of depression with our data.  
15  
16  
17  
18  
19  
20

21 Despite these limitations, our results confirm previous reports on depression using smaller  
22  
23 samples and provide information on the largest cohort of those with depression in Canada using  
24  
25 clinical EMR data. These findings suggest more could be done in screening for depression  
26  
27 among men visiting their primary care provider and among those who have a chronic condition,  
28  
29 have been a past or current smoker, or women with a BMI indicative of obesity.  
30  
31  
32  
33  
34

35 ACKNOWLEDGEMENTS. CPCSSN is funded by the Public Health Agency of Canada under a  
36  
37 contribution agreement with the College of Family Physicians of Canada on behalf of ten  
38  
39 practice based research networks (PBRNs) across Canada.  
40  
41  
42  
43  
44  
45  
46  
47  
48  
49  
50  
51  
52  
53  
54  
55  
56  
57  
58  
59  
60

## REFERENCES

- 1 Anderson J, Huppert F, Geoffrey R. Normality, deviance, and minor psychiatric morbidity in the community: A population-based approach to General Health Questionnaire data in the Health and Lifestyle Survey. *Psychol Med* 1993;**23**:475–85.
- 2 Craven MA, Bland R. Depression in primary care: Current and future challenges. *Can J Psychiatry* 2013;**58**:442–8.<http://www.ncbi.nlm.nih.gov/pubmed/23972105>
- 3 Clarke DM, Currie KC. Depression, anxiety and their relationship with chronic diseases: A review of the epidemiology, risk and treatment evidence. *Med J Aust* 2009;**190**:S54–60.<http://www.ncbi.nlm.nih.gov/pubmed/19351294>
- 4 Moussavi S, Chatterji S, Verdes E, *et al.* Depression, chronic diseases, and decrements in health: Results from the World Health Surveys. *Lancet* 2007;**370**:851–8.<http://www.ncbi.nlm.nih.gov/pubmed/17826170> (accessed 29 Apr2014).
- 5 Dowlati Y, Herrmann N, Swardfager W, *et al.* A meta-analysis of cytokines in major depression. *Biol Psychiatry* 2010;**67**:446–57. doi:10.1016/j.biopsych.2009.09.033
- 6 Patten SB, Williams JV a, Lavorato DH, *et al.* Major depression as a risk factor for chronic disease incidence: Longitudinal analyses in a general population cohort. *Gen Hosp Psychiatry* 2008;**30**:407–13. doi:10.1016/j.genhosppsych.2008.05.001
- 7 World Health Organization. The global burden of disease: 2004 update. Geneva, Switzerland: : World Health Organization 2008. [http://www.who.int/healthinfo/global\\_burden\\_disease/2004\\_report\\_update/en/](http://www.who.int/healthinfo/global_burden_disease/2004_report_update/en/) (accessed 6 May2014).
- 8 Üstün TB. WHO Collaborative Study: An epidemiological survey of psychological problems in general health care in 15 centers worldwide. *Int Rev Psychiatry* 1994;**6**:357–63. doi:10.3109/09540269409023273
- 9 Canadian Primary Care Sentinel Surveillance Network. Canadian Primary Care Sentinel Surveillance Network. 2013.<http://cpcssn.ca/> (accessed 2 Jan2014).
- 10 Williamson T, Green M, Birtwhistle R, *et al.* Expanding opportunities for using electronic medical record data: Validation of eight case definitions for chronic disease surveillance in the Canadian Primary Care Sentinel Surveillance Network database. *Ann Fam Med* (accepted Publ
- 11 Canada Post Corporation. Addressing Guidelines, Important Updates. Canada Post Corp. 2014;:1–17.<http://www.canadapost.ca/textonly/tools/pg/manual/pgaddress-e.asp#1416938> (accessed 7 Apr2014).

- 1  
2  
3  
4  
5  
6 12 Williamson T, Eliasziw M, Fick GH. Log-binomial models: exploring failed convergence.  
7 *Emerg Themes Epidemiol* 2013;**10**:14.<http://www.ete-online.com/content/10/1/14>  
8 (accessed 6 May2014).  
9
- 10  
11 13 Patten SB, Wang JL, Williams JVA, *et al.* Descriptive epidemiology of major depression  
12 in Canada. *Can J Psychiatry* 2006;**51**:84–  
13 90.<http://www.ncbi.nlm.nih.gov/pubmed/16989107> (accessed 6 May2014).  
14
- 15  
16 14 Romans S, Cohen M, Forte T. Rates of depression and anxiety in urban and rural Canada.  
17 *Soc Psychiatry Psychiatr Epidemiol* 2011;**46**:567–75. doi:10.1007/s00127-010-0222-2  
18
- 19  
20 15 Wang JL. Rural-urban differences in the prevalence of major depression and associated  
21 impairment. *Soc Psychiatry Psychiatr Epidemiol* 2004;**39**:19–25. doi:10.1007/s00127-  
22 004-0698-8  
23
- 24  
25 16 Patten SB. Long-term medical conditions and major depression in a Canadian population  
26 study at waves 1 and 2. *J Affect Disord* 2001;**63**:35–  
27 41.<http://www.ncbi.nlm.nih.gov/pubmed/11246078> (accessed 6 May2014).  
28
- 29  
30 17 Preiss K, Brennan L, Clarke D. A systematic review of variables associated with the  
31 relationship between obesity and depression. *Obes Rev* 2013;**14**:906–18.  
32 doi:10.1111/obr.12052
- 33  
34 18 Mitchell AJ, Vaze A, Rao S. Clinical diagnosis of depression in primary care: A meta-  
35 analysis. *Lancet* 2009;**374**:609–19. doi:10.1016/S0140-6736(09)60879-5  
36
- 37  
38 19 Ogrodniczuk JS, Oliffe JL. Men and depression. *Can Fam Med Physician* 2011;**57**:153–  
39 5.<http://www.cfp.ca/content/57/2/153.full> (accessed 6 May2014).  
40
- 41  
42 20 Simpson KRS, Meadows GN, Frances AJ, *et al.* Is mental health in the Canadian  
43 population changing over time? *Can J Psychiatry* 2012;**57**:324–  
44 31.<http://www.ncbi.nlm.nih.gov/pubmed/22546065> (accessed 6 May2014).  
45
- 46  
47 21 Mueller TI, Leon AC, Keller MB, *et al.* Recurrence after recovery from major depressive  
48 disorder during 15 years of observational follow-up. *Am J Psychiatry* 1999;**156**:1000–  
49 6.<http://www.ncbi.nlm.nih.gov/pubmed/10401442> (accessed 2 Jun2014).  
50
- 51  
52 22 Parikh S V, Segal Z V, Grigoriadis S, *et al.* Canadian Network for Mood and Anxiety  
53 Treatments (CANMAT) clinical guidelines for the management of major depressive  
54 disorder in adults. II. Psychotherapy alone or in combination with antidepressant  
55 medication. *J Affect Disord* 2009;**117 Suppl**:S15–25. doi:10.1016/j.jad.2009.06.042  
56  
57  
58  
59  
60

- 1  
2  
3  
4  
5  
6 23 Patten SB, Williams JVA, Lavorato DH, *et al.* Recall of recent and more remote  
7 depressive episodes in a prospective cohort study. *Soc Psychiatry Psychiatr Epidemiol*  
8 2012;**47**:691–6. doi:10.1007/s00127-011-0385-5  
9  
10  
11 24 Patten SB, Gordon-Brown L, Meadows G. Simulation studies of age-specific lifetime  
12 major depression prevalence. *BMC Psychiatry* 2010;**10**:85. doi:10.1186/1471-244X-10-85  
13  
14 25 Puyat JH, Marhin WW, Etches D, *et al.* Estimating the prevalence of depression from  
15 EMRs. *Can Fam Med*  
16 2013;**59**:445.<http://www.pubmedcentral.nih.gov/articlerender.fcgi?artid=3625092&tool=pmcentrez&rendertype=abstract>  
17  
18  
19  
20  
21  
22  
23  
24  
25  
26  
27  
28  
29  
30  
31  
32  
33  
34  
35  
36  
37  
38  
39  
40  
41  
42  
43  
44  
45  
46  
47  
48  
49  
50  
51  
52  
53  
54  
55  
56  
57  
58  
59  
60

Confidential

## TABLES AND FIGURE

**Table 1. List of depression drugs by classification**

|                                                             |                |             |                 |
|-------------------------------------------------------------|----------------|-------------|-----------------|
| <b>SSRI</b> (Selective serotonin reuptake inhibitors):      | CITALOPRAM     | FLUOXETINE  | PAROXETINE      |
|                                                             | DAPOXETINE     | FLUVOXAMINE | SERTRALINE      |
|                                                             | ESCITALOPRAM   |             |                 |
| <b>TRICYCLICS/<br/>TETRACYCLICS</b>                         | AMITRIPTYLINE  | DESIPRAMINE | MAPROTILINE     |
|                                                             | AMOXAPINE      | DOTHIEPIN   | NORTRIPTYLINE   |
|                                                             | BUTRIPTYLINE   | DOXEPIN     | PROTRIPTYLINE   |
|                                                             | CLOMIPRAMINE   | IMIPRAMINE  | TRIMIPRAMINE    |
| <b>SNRI</b> (Serotonin norepinephrine reuptake inhibitors): | DESVENLAFAXINE | MILNACIPRAN | VENLAFAXINE     |
|                                                             | DULOXETINE     |             |                 |
| <b>SARI</b> (Serotonin antagonist and reuptake inhibitors): | TRAZODONE      |             |                 |
| <b>ATYPICAL</b> (Antipsychotics):                           | AGOMELATINE    | BUPROPION   | QUETIAPINE      |
|                                                             | ARIPIRAZOLE    | MIRTAZAPINE |                 |
| <b>MAOI</b> (Monoamine oxidase inhibitors):                 | ISOCARBOXAZID  | PHENELZINE  | TRANLYCYPROMINE |
|                                                             | MOCLOBEMIDE    | SELEGILINE  |                 |
| <b>BIPOLAR</b>                                              | LITHIUM        | DIVALPROEX  | VALPROATE       |
|                                                             | CARBAMAZEPINE  | LAMOTRIGINE |                 |

**Figure 1.**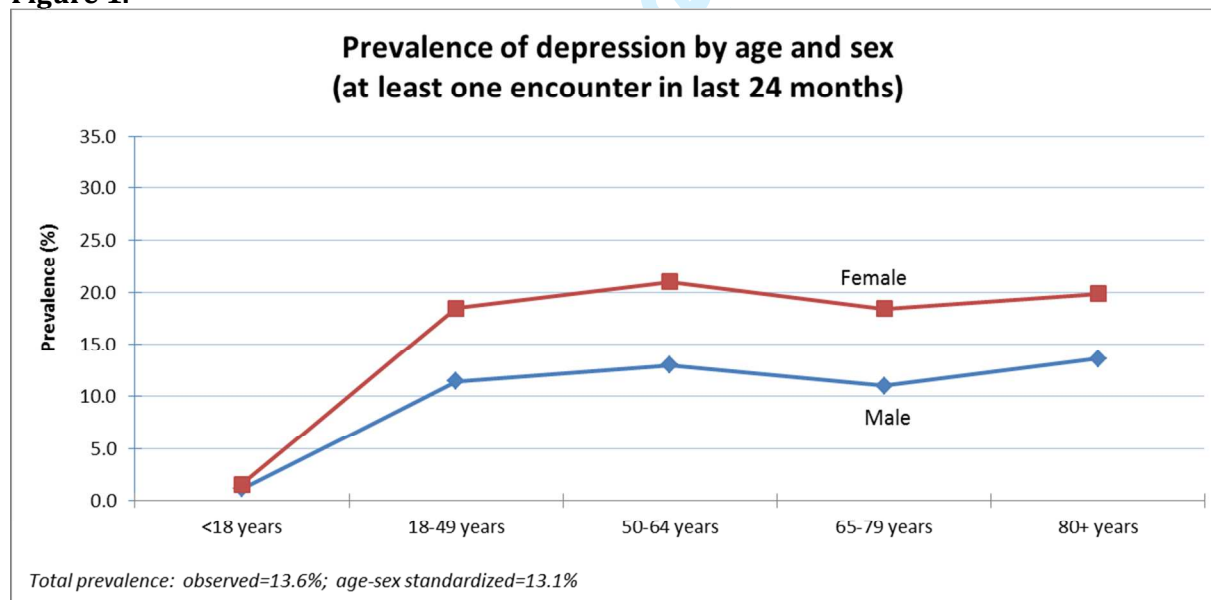



**Table 2. Age Adjusted Characteristics associated with depression for men and women**

| Characteristics             | Parameter Estimates for MALES |              |              |        | Parameter Estimates for FEMALES |              |              |        |
|-----------------------------|-------------------------------|--------------|--------------|--------|---------------------------------|--------------|--------------|--------|
|                             | Prev. Ratio                   | Lower 95% CI | Upper 95% CI | p      | Prev. Ratio                     | Lower 95% CI | Upper 95% CI | p      |
| <b>Location</b>             |                               |              |              |        |                                 |              |              |        |
| <i>Urban = ref</i>          | 1.00                          | --           | --           | --     | 1.00                            | --           | --           | --     |
| Rural                       | 0.90                          | 0.869        | 0.941        | <0.001 | 0.92                            | 0.900        | 0.949        | <0.001 |
| <b>BMI group</b>            |                               |              |              |        |                                 |              |              |        |
| <i>Normal (18-24) = ref</i> | 1.00                          | --           | --           | --     | 1.00                            | --           | --           | --     |
| Underweight (<18)           | 0.91                          | 0.830        | 1.005        | NS     | 0.96                            | 0.907        | 1.026        | NS     |
| Overweight (25-29)          | 0.95                          | 0.903        | 0.998        | <0.05  | 1.06                            | 1.032        | 1.097        | <0.001 |
| Obese (>= 30)               | 1.03                          | 0.981        | 1.085        | NS     | 1.17                            | 1.133        | 1.203        | <0.001 |
| <b>Smoking</b>              |                               |              |              |        |                                 |              |              |        |
| <i>Never = ref</i>          | 1.00                          | --           | --           | --     | 1.00                            | --           | --           | --     |
| Current                     | 1.54                          | 1.455        | 1.635        | <0.001 | 1.60                            | 1.542        | 1.659        | <0.001 |
| Past                        | 1.17                          | 1.095        | 1.242        | <0.001 | 1.32                            | 1.274        | 1.377        | <0.001 |

Note: Missing data for location 10,650 (male=4977, female=5673); BMI 117,374 (male=53917, female=63457); smoking 201,139 (male=89686, female=111453).

**Table 3. Presence of depression by number of other chronic conditions**

| # of other comorbid conditions | MALE depression (%) |          | FEMALE depression (%) |          | ALL depression (%) |          |
|--------------------------------|---------------------|----------|-----------------------|----------|--------------------|----------|
|                                | Absent              | Present  | Absent                | Present  | Absent             | Present  |
| 0 other condition              | 70.9                | 54.4     | 73.1                  | 58.5     | 72.1               | 57.2     |
| 1 other condition              | 19.4                | 26.3     | 17.5                  | 24.3     | 18.4               | 24.9     |
| 2 other conditions             | 7.6                 | 13.7     | 7.3                   | 11.9     | 7.5                | 12.4     |
| 3+ other conditions            | 2.1                 | 5.6      | 2.1                   | 5.3      | 2.0                | 5.5      |
| Total                          | 100.0               | 100.0    | 100.0                 | 100.0    | 100.0              | 100.0    |
| (N)                            | (118,424)           | (12,748) | (144,714)             | (28,526) | (263,138)          | (41,274) |

**Table 4. Age adjusted prevalence ratios of depression by comorbidity**

| Comorbidity    | Parameter Estimates for MALES |              |              |        | Parameter Estimates for FEMALES |              |              |        |
|----------------|-------------------------------|--------------|--------------|--------|---------------------------------|--------------|--------------|--------|
|                | Prev. Ratio                   | Lower 95% CI | Upper 95% CI | p      | Prev. Ratio                     | Lower 95% CI | Upper 95% CI | p      |
| Hypertension   | 1.15                          | 1.119        | 1.180        | <0.001 | 1.14                            | 1.117        | 1.159        | <0.001 |
| Diabetes       | 1.23                          | 1.183        | 1.288        | <0.001 | 1.36                            | 1.314        | 1.415        | <0.001 |
| COPD           | 1.78                          | 1.667        | 1.901        | <0.001 | 1.82                            | 1.721        | 1.919        | <0.001 |
| Osteoarthritis | 1.37                          | 1.311        | 1.433        | <0.001 | 1.35                            | 1.315        | 1.389        | <0.001 |
| Dementia       | 3.23                          | 2.964        | 3.516        | <0.001 | 2.47                            | 2.321        | 2.632        | <0.001 |
| Epilepsy       | 2.03                          | 1.767        | 2.332        | <0.001 | 1.82                            | 1.627        | 2.042        | <0.001 |
| Parkinsonism   | 2.27                          | 1.863        | 2.774        | <0.001 | 2.22                            | 1.830        | 2.698        | <0.001 |

**Table 5. Utilization: number of encounters with primary care provider**

|           |           | Depression=No |           |           | Depression=Yes |            |            |
|-----------|-----------|---------------|-----------|-----------|----------------|------------|------------|
|           |           | Male          | Female    | All       | Male           | Female     | All        |
| 12 months | Mean (SD) | 3.7 (3.8)     | 4.1 (4.0) | 3.9 (3.9) | 5.6 (5.2)      | 6.3 (5.5)  | 6.1 (5.4)  |
|           | Median    | 3.0           | 3.0       | 3.0       | 4.0            | 5.0        | 5.0        |
| 24 months | Mean (SD) | 5.9 (6.4)     | 7.0 (7.0) | 6.5 (6.8) | 10.1 (9.3)     | 11.5 (9.7) | 11.1 (9.6) |
|           | Median    | 4.0           | 5.0       | 4.0       | 8.0            | 9.0        | 9.0        |

**Table 6. Number of depression medications taken by patients with depression**

| Number of depression medications | Male  |       | Female |       | All   |       |
|----------------------------------|-------|-------|--------|-------|-------|-------|
|                                  | %     | N     | %      | N     | %     | N     |
| 0                                | 17.4  | 2222  | 14.3   | 4083  | 15.3  | 6305  |
| 1                                | 48.3  | 6155  | 48.0   | 13691 | 48.1  | 19846 |
| 2                                | 22.7  | 2889  | 23.7   | 6746  | 23.3  | 9635  |
| 3+                               | 11.6  | 1482  | 14.0   | 4006  | 13.3  | 5488  |
| Total                            | 100.0 | 12748 | 100.0  | 28526 | 100.0 | 41274 |

**Table 7. Types of depression medications used by patients with depression**

| Medications           | % used         |                  |               |
|-----------------------|----------------|------------------|---------------|
|                       | Male (n=12748) | Female (n=28526) | All (n=41274) |
| SSRI                  | 65.0           | 69.3             | 68.0          |
| Tricyclic/Tetracyclic | 10.9           | 14.1             | 13.1          |
| SNRI                  | 19.4           | 22.4             | 21.5          |
| SARI                  | 9.0            | 10.5             | 10.0          |
| ATYPICAL              | 24.1           | 22.3             | 22.8          |
| MAOI                  | 0.3            | 0.3              | 0.3           |
| BIPOLAR               | 4.0            | 3.4              | 3.6           |
| No depression drugs   | 17.4           | 14.3             | 15.3          |

Confidential

1  
2  
3  
4  
5  
6  
7  
8  
9  
10  
11  
12  
13  
14  
15  
16  
17  
18  
19  
20  
21  
22  
23  
24  
25  
26  
27  
28  
29  
30  
31  
32  
33  
34  
35  
36  
37  
38  
39  
40  
41  
42  
43  
44  
45  
46  
47  
48  
49

**STROBE 2007 (v4) Statement—Checklist of items that should be included in reports of *cross-sectional studies***

| Section/Topic                | Item # | Recommendation                                                                                                                                                                       | Reported on page # |
|------------------------------|--------|--------------------------------------------------------------------------------------------------------------------------------------------------------------------------------------|--------------------|
| <b>Title and abstract</b>    | 1      | (a) Indicate the study’s design with a commonly used term in the title or the abstract                                                                                               | 1                  |
|                              |        | (b) Provide in the abstract an informative and balanced summary of what was done and what was found                                                                                  | 2                  |
| <b>Introduction</b>          |        |                                                                                                                                                                                      |                    |
| Background/rationale         | 2      | Explain the scientific background and rationale for the investigation being reported                                                                                                 | 3-4                |
| Objectives                   | 3      | State specific objectives, including any prespecified hypotheses                                                                                                                     | 4                  |
| <b>Methods</b>               |        |                                                                                                                                                                                      |                    |
| Study design                 | 4      | Present key elements of study design early in the paper                                                                                                                              | 4                  |
| Setting                      | 5      | Describe the setting, locations, and relevant dates, including periods of recruitment, exposure, follow-up, and data collection                                                      | 4-5                |
| Participants                 | 6      | (a) Give the eligibility criteria, and the sources and methods of selection of participants                                                                                          | 4-5                |
| Variables                    | 7      | Clearly define all outcomes, exposures, predictors, potential confounders, and effect modifiers. Give diagnostic criteria, if applicable                                             | 5-6                |
| Data sources/<br>measurement | 8*     | For each variable of interest, give sources of data and details of methods of assessment (measurement). Describe comparability of assessment methods if there is more than one group | 4-6                |
| Bias                         | 9      | Describe any efforts to address potential sources of bias                                                                                                                            | 11                 |
| Study size                   | 10     | Explain how the study size was arrived at                                                                                                                                            | 4                  |
| Quantitative variables       | 11     | Explain how quantitative variables were handled in the analyses. If applicable, describe which groupings were chosen and why                                                         | 4-6                |
| Statistical methods          | 12     | (a) Describe all statistical methods, including those used to control for confounding                                                                                                | 6                  |
|                              |        | (b) Describe any methods used to examine subgroups and interactions                                                                                                                  | 6                  |
|                              |        | (c) Explain how missing data were addressed                                                                                                                                          | 11-12              |
|                              |        | (d) If applicable, describe analytical methods taking account of sampling strategy                                                                                                   | N/A                |
|                              |        | (e) Describe any sensitivity analyses                                                                                                                                                | N/A                |
| <b>Results</b>               |        |                                                                                                                                                                                      |                    |

|                          |     |                                                                                                                                                                                                              |                                     |
|--------------------------|-----|--------------------------------------------------------------------------------------------------------------------------------------------------------------------------------------------------------------|-------------------------------------|
| Participants             | 13* | (a) Report numbers of individuals at each stage of study—eg numbers potentially eligible, examined for eligibility, confirmed eligible, included in the study, completing follow-up, and analysed            | 7                                   |
|                          |     | (b) Give reasons for non-participation at each stage                                                                                                                                                         | N/A                                 |
|                          |     | (c) Consider use of a flow diagram                                                                                                                                                                           | N/A                                 |
| Descriptive data         | 14* | (a) Give characteristics of study participants (eg demographic, clinical, social) and information on exposures and potential confounders                                                                     | 7-8                                 |
|                          |     | (b) Indicate number of participants with missing data for each variable of interest                                                                                                                          | N/A                                 |
| Outcome data             | 15* | Report numbers of outcome events or summary measures                                                                                                                                                         | 8                                   |
| Main results             | 16  | (a) Give unadjusted estimates and, if applicable, confounder-adjusted estimates and their precision (eg, 95% confidence interval). Make clear which confounders were adjusted for and why they were included | See Table 5 & 6                     |
|                          |     | (b) Report category boundaries when continuous variables were categorized                                                                                                                                    | See table 5 & 6                     |
|                          |     | (c) If relevant, consider translating estimates of relative risk into absolute risk for a meaningful time period                                                                                             | N/A                                 |
| Other analyses           | 17  | Report other analyses done—eg analyses of subgroups and interactions, and sensitivity analyses                                                                                                               | See Tables—analyses are by subgroup |
| <b>Discussion</b>        |     |                                                                                                                                                                                                              |                                     |
| Key results              | 18  | Summarise key results with reference to study objectives                                                                                                                                                     | 7-8                                 |
| Limitations              | 19  | Discuss limitations of the study, taking into account sources of potential bias or imprecision. Discuss both direction and magnitude of any potential bias                                                   | 11                                  |
| Interpretation           | 20  | Give a cautious overall interpretation of results considering objectives, limitations, multiplicity of analyses, results from similar studies, and other relevant evidence                                   | 9-11                                |
| Generalisability         | 21  | Discuss the generalisability (external validity) of the study results                                                                                                                                        | 12                                  |
| <b>Other information</b> |     |                                                                                                                                                                                                              |                                     |
| Funding                  | 22  | Give the source of funding and the role of the funders for the present study and, if applicable, for the original study on which the present article is based                                                | 125                                 |

\*Give information separately for cases and controls in case-control studies and, if applicable, for exposed and unexposed groups in cohort and cross-sectional studies.

**Note:** An Explanation and Elaboration article discusses each checklist item and gives methodological background and published examples of transparent reporting. The STROBE checklist is best used in conjunction with this article (freely available on the Web sites of PLoS Medicine at <http://www.plosmedicine.org/>, Annals of Internal Medicine at <http://www.annals.org/>, and Epidemiology at <http://www.epidem.com/>). Information on the STROBE Initiative is available at [www.strobe-statement.org](http://www.strobe-statement.org).
